# Supplementary material
Source: Springer Nature journal article supplement (https://www.springermedizin.de/resource/supplementary/13054_2009_7660_MOESM1_ESM.pdf/9730234)
Supplement: MOESM1 [file 9730234]

347 patients eligible for the study

195 patients excluded  
94 had exclusion criterion  
93 refused to participate  
8 decision of intensivist

152 patients  
randomized

76 Assigned to conventional tidal volume  
1 Lost due to transfer to other hospital  
1 Excluded because of having ARDS directly  
after randomization

76 Assigned to lower tidal volume

74 Included in analysis

76 Included in analysis
